# Der Granat (*Crangon vulgaris* Fabr.) in den holländischen Gewässern.

Von

**B. Havinga.**

Rijksinstituut voor Visscherijonderzoek, Amsterdam.

Seit der grundlegenden Arbeit von EHRENBAUM: Zur Naturgeschichte von *Crangon vulgaris* Fabr.<sup>1)</sup> haben nur wenig Fischereibiologen sich veranlasst gefühlt, sich eingehend mit der Lebensgeschichte dieses ungemein häufig und allgemein vorkommenden Krusters zu beschäftigen. In dieser Hinsicht sind noch die Arbeiten von WILLIAMSON<sup>2)</sup> und von HENKING<sup>3)</sup> zu nennen. Die Ursache, dass der Granat so wenig die Aufmerksamkeit der Forscher auf sich gelenkt hat, wird zum grössten Teil in dem Umstand zu suchen sein, dass EHRENBAUM eine ausführliche Beschreibung der wichtigsten Tatsachen aus der allgemeinen Lebensgeschichte des Granat gegeben und die belangreichsten Fragen zur Lösung gebracht hat. Andererseits hat sich nur selten die Notwendigkeit gezeigt, Schutzmassregeln zur Erhaltung des Granatbestandes einzuführen, so dass auch dadurch die Fischereibiologen sich nur wenig mit den speziellen Verhältnissen in anderen Küstengewässern als denen, welche EHRENBAUM in seine Untersuchung bezogen hat, bemüht haben.

Die Fruchtbarkeit des Granat ist so gross, dass Schutzmassregeln meistens ganz entbehrlich sind. Sie hat in den holländischen Gewässern auch immer genügt, um den Bestand auf natürliche Weise aufrecht zuhalten; es scheint aber, dass stellenweise durch die fortwährend zunehmende Intensität der Fischerei die Grenzen des Produktionsvermögens erreicht sind; die Erträge sinken, so dass von verschiedenen

<sup>1)</sup> Sonderbeilage zu den Mitteilungen der Sektion für Küsten- und Hochseefischerei. 1890.

<sup>2)</sup> On the larval Stages of Decapod Crustacea. The Shrimp (*Crangon vulgaris* Fabr.). Fish. Board f. Scotland. Ann. Rep. XIX. 1900.

<sup>3)</sup> HENKING-DECKER und DE VRIES. Die Garnelenfischerei. Abh. d. deutschen Seefischerei Vereins. Bd. 5. 1900.

Seiten Klagen über ungenügenden Fang erhoben wurden. Ich habe mich dadurch veranlasst gefühlt, die Lebensverhältnisse, die Fortpflanzung und das Wachstum in verschiedenen holländischen Gewässern eingehend zu untersuchen.

Die belangreichsten holländischen Gebiete, wo der Granat Gegenstand der Fischerei ist, sind: Dollart, Lauwerssee, Zuidersee, die Flussmündungen in Süd-Holland und Zeeland und die Nordseeküsten in der Nähe dieser Gewässer. Die Grösse der Erträge in diesen Gebieten ist aus Tabelle 1 ersichtlich.

Tabelle 1.  
Erträge des Granatfanges in den belangreichsten Bezirken in 1000 kg.

| Jahr     | Zeeland <sup>1)</sup> | S.<br>Holland <sup>2)</sup> | Nördlicher<br>Teil der<br>Zuidersee | Südlicher<br>Teil der<br>Zuidersee | Lauwerssee<br>& Dollart | Total |
|----------|-----------------------|-----------------------------|-------------------------------------|------------------------------------|-------------------------|-------|
| 1928.... | 1893                  | 938                         | 739                                 | 2117                               | 2458                    | 8145  |
| 1927.... | 1307                  | 698                         | 1112                                | 2541 <sup>3)</sup>                 | 1471                    | 7129  |
| 1926.... | 1550                  | 1009                        | 742                                 | 1588                               | 1131                    | 6020  |
| 1925.... | 2497                  | 1229                        | 577                                 | 1910                               | 1626                    | 7839  |
| 1924.... | 2350                  | 1060                        | 724                                 | 1612                               | 1448                    | 7194  |
| 1923.... | 2028                  | 1040                        | 659                                 | 1594                               | 892                     | 6213  |
| 1922.... | 1655                  | 866                         | 398                                 | 1621                               | 1067                    | 5607  |
| 1921.... | 1613                  | 1062                        | 205                                 | 1925                               | 540                     | 5345  |
| 1920.... | 3410                  | 854                         | 339                                 | 1885                               | 394                     | 6882  |
| 1919.... | 1954                  | 825                         | 791                                 | 1747                               | 712                     | 6029  |
| 1918.... | 2096                  | 1299                        | 773                                 | 3787                               | 793                     | 8748  |
| 1917.... | 2109                  | 889                         | 611                                 | 2411                               | 752                     | 6772  |

Der Totalfang ist ziemlich grossen Schwankungen unterworfen, die grösstenteils verursacht werden durch mehr oder weniger reichen Granatbestand, zum geringeren Teil jedoch auch der schwankenden Intensität der Fischerei zuzuschreiben sind. Die geringeren Erträge in Süd-Holland und Zeeland der letzten Jahre (1926 und 1927) sind aber nur die Folge des abnehmenden Reichtumes des Bestandes. Es ist noch nicht sicher, ob hier natürliche Schwankungen vorliegen oder ob eine zu

<sup>1)</sup> Westerschelde, Osterschelde, Grevelingen und deren Mündungen.

<sup>2)</sup> Hauptsächlich Haringvliet und dessen Mündung.

<sup>3)</sup> Die Zahlen für die Zuidersee sind in Wirklichkeit grösser, weil ein Teil des gefangenen Granat nicht sortiert wird, sondern zusammen mit Jungfischen verschiedener Arten als Geflügelfutter verwendet wird und nicht gesondert in der Statistik vorkommt.

intensive Fischerei in den vorletzten Jahren die Ursache ist. Der Rückgang der Fänge war in den süd-holländischen Gewässern am stärksten und gerade hier wurden grosse Mengen kleiner Granat für die Herstellung von Granatschrot verwendet. Der Gedanke liegt nahe, dass ein Zusammenhang zwischen diesen beiden Erscheinungen zu suchen ist.

Die Untersuchungsmethode war rein biometrisch. Die Proben, welche mir zugesandt oder von mir selbst gesammelt wurden, wurden immer auf dieselbe Weise bearbeitet. Männchen, Weibchen und eiertragende Weibchen wurden ausgesucht und jede Gruppe für sich gemessen. Von jedem eiertragenden Weibchen wurden eine Anzahl Eier genommen, von welchen je 3 Stück gemessen wurden und das Entwicklungsstadium bestimmt wurde. Die Granat, welche als Proben dienten, wurden entweder aus den Fängen der Fischer genommen (Westerschelde und Haringvliet) oder sie wurden mit einem Netz gefangen, das verfertigt wurde aus einer Austernkurre, deren Messer von einem dünnen Stahldraht und deren grobes Netz von einem feinen ersetzt wurde; mit diesem Netz gelang es fast immer, in 7 Minuten wenigstens eine Probe von 0,4 L. zu fangen. Die Proben wurden immer im Laboratorium untersucht, 1—2 Tage nachdem sie gefangen waren. Eine Konservierung konnte nicht unterbleiben, namentlich auch weil die Eier sonst bei der Versendung loslassen. Bei längerem Verbleiben in Formol schrumpfen die Embryonen stark zusammen, während die Eimembranen schwellen; eine Messung ist dann nicht mehr möglich. Bei Konservierung auf Alkohol werden die Embryonen undurchsichtig und ist die Entwicklung des Pigmentes nicht mehr zu verfolgen. Diese Schwierigkeiten wurden beseitigt, indem die Granat ungefähr 1 Stunde auf 2 % Formol aufbewahrt und dann ohne Flüssigkeit in Blechdosen versandt wurden.

### Fortpflanzung.

EHRENBAUM hat gezeigt, dass der Granat zwei Hauptperioden der Eiablage hat, die erste fällt in die Zeit von Mitte April bis Anfang Juni, die zweite in den Oktober und November. Diese Perioden sind nach EHRENBAUM nicht scharf von einander getrennt, sondern sie fallen teilweise zusammen, weil im Frühjahr die fast reifen Eier zusammen mit den eben abgelegten vorkommen. Ich habe die Untersuchungen von EHRENBAUM in den holländischen Gewässern wiederholt und habe dabei die Entwicklung der Eier soviel wie möglich durch Messungen verfolgt. Der Reifungsvorgang der Eier geht nämlich mit einer beträchtlichen Längenzunahme ( $\pm 60\%$ ) zusammen und im Anfang habe ich diese als ein Mass für das Entwicklungsstadium betrachtet. Die Messungen der Eilänge sind für jeden Monat der Jahre 1927 und 1928 in einer gra-

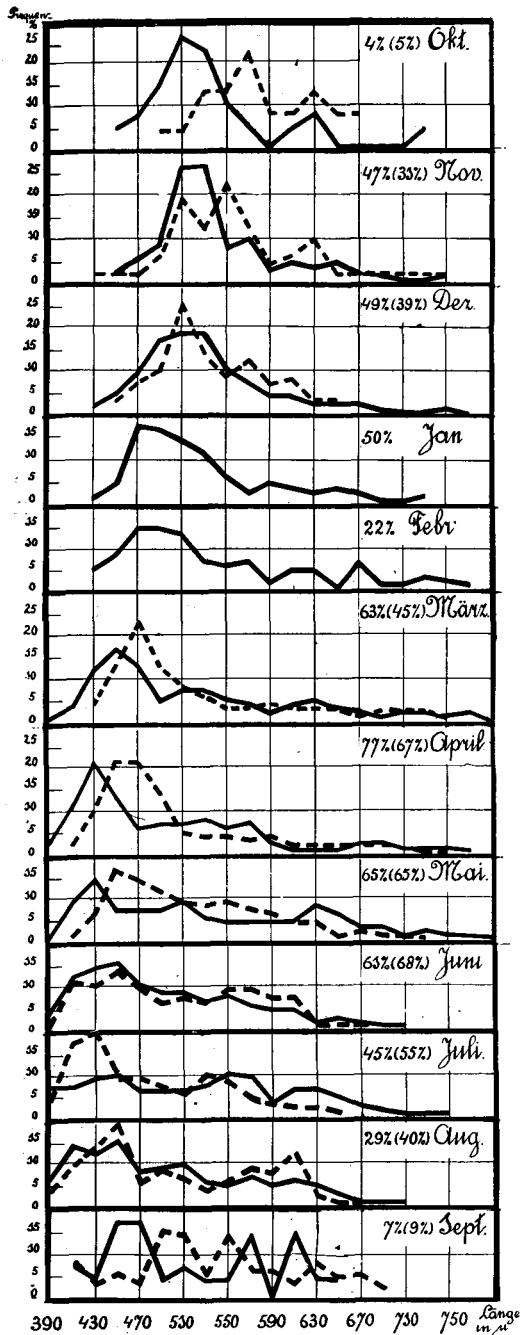

Abb. 1. Die durchschnittliche Länge von Granateiern in den verschiedenen Monaten des Jahres; die gezogenen Linien beziehen sich auf 1928, die gebrochenen auf 1927. Die Zahlen in den Figuren geben die Prozentsätze von eiertragenden Weibchen an (berechnet auf Weibchen von mehr als 50 mm Länge) für 1928 und für 1927 (...).

phischen Darstellung zusammengestellt (Abb. 1), während auch der Prozentsatz der eiertragenden Weibchen (berechnet auf die grösseren, geschlechtsreifen Weibchen) für jeden Monat hinzugefügt wurde; für die Bestimmung dieser Zahl wurden nur solche Proben verwendet, die aus Bezirken herkommen, wo die Larven ausschlüpfen. Aus den Zahlen in der Figur ersieht man, dass das ganze Jahr hindurch Eier vorkommen. Ein tiefes Minimum liegt jedoch in September und Oktober.

Bevor es möglich ist, die Perioden der Eiablage zu besprechen, ist es notwendig, uns erst mit der Länge der Eier zu beschäftigen. Es hat sich während der Untersuchungen nämlich gezeigt, dass diese Länge nicht immer als ein Mass für das Reifestadium zu verwenden ist: es gibt nämlich 2 Grössenklassen von Eiern und zwar sind die, welche im Winter abgelegt werden (welche ich Wintereier nennen werde), grösser als die im Sommer abgelegten (Sommereier). Es war deshalb notwendig, ein anderes Mass für die Unterscheidung der Reifestadien zu benutzen, das leicht und mit Sicherheit zu erkennen war; ich habe dazu die Entwicklung des Pigmentes gewählt und 4 Klassen unterschieden: 1° ohne Pigment, 2° mit Naupliusauge ohne Chromatophoren; 3° mit Chromatophoren; 4° mit grossen, sternförmigen Chromatophoren, zum Teil schon ausschlüpfend. Unter den Eiern, welche von Ende Oktober bis Anfang März abgelegt werden, kommen keine kleineren vor als 0,43 mm (Abb. 1); die durchschnittliche Länge der Eier ohne Pigment ist 0,51 mm, bei den von März bis September abgelegten Eiern sind diese Zahlen 0,37 mm und 0,42 mm. Bei den Wintereiern fängt das Naupliuspigment bei 0,53 mm an sich zu entwickeln, die Chromatophoren bei 0,60 mm, die Larven schlüpfen aus bei einer Länge der Eier von 0,70 bis 0,75 mm; bei den Sommereiern sind diese Zahlen: 0,45 mm, 0,51 mm und 0,62—0,70 mm. Die Wintereier sind also durchschnittlich 0,08 mm oder ungefähr 15 % länger als die Sommereier. Dadurch wird erklärt, dass in Figur 1 die Gipfel der Linien im Sommer — und oft auch die Linie in ihrem Ganzen — mehr nach links liegen als im Winter. Uebrigens zeigen die Linien von Februar bis Juni eine grosse Uebereinstimmung in Form. Die stärkst ausgesprochenen Gipfel liegen immer im linken Teil der Figur, während die Prozentsätze der grösseren Eier immer viel niedriger sind. Daraus erfolgt, dass die Eier in der ersten Zeit weniger schnell an Länge zunehmen als später. Auch dauert es ziemlich lange, bevor das Augenpigment zum Vorschein tritt.

Der Unterschied von Winter- und Sommereiern ist so gross, dass es in weitaus den meisten Fällen möglich ist zu bestimmen, welche von beiden vorliegen. Im Jahre 1928 wurden die ersten Sommereier am 7. März beobachtet, 1927 am 17. März. Die nach der Ruheperiode im

Oktober und später abgelegten Eier sind ohne Ausnahme Wintererier; die, welche Anfang Oktober noch anzutreffen sind, haben alle schon weit entwickelte Embryonen, es sind die letzten Sommereier, welche ungefähr am 10. September abgelegt sind. Vom 20. Sept.—10. Oktober kommen so gut wie keine neu abgelegten Eier vor und wir werden den Prozess der Ablage und Entwicklung der Eier von dieser Ruheperiode ab beschreiben.

Die ersten Weibchen mit Eiern sind vom 10. oder 20. Oktober an anzutreffen und schon in der ersten Dekade des November sind in einzelnen Proben bis über 40 % der Weibchen von mehr als 51 mm<sup>1)</sup> Länge mit Eiern besetzt. In den verschiedenen Teilen des Untersuchungsgebietes von der Westerschelde bis zum nördlichen Teil der Zuidersee erfolgt die Ablage gleichzeitig. Der Prozentsatz nimmt dann noch weiter zu, so dass er im November einen Durchschnittswert von 47 %<sup>2)</sup> erhält (1928; 1927 nur 31 %, ein Wert der aber auf nur 3 Beobachtungen beruht und sicher zu niedrig ist).

In den folgenden Monaten werden dann nicht mehr erheblich höhere Werte erreicht. Die Zahlen für Januar und Februar sind jedoch auch nicht gut mit den anderen zu vergleichen, weil dann der Granat und namentlich die Weibchen mit reifenden Eiern sich in solche Stellen zurückziehen, dass sie nicht mehr zu erbeuten sind. Es ist aber wahrscheinlich, dass Ende Februar — wenn die Weibchen mit reifenden Eiern wieder aus ihren Verstecken zum Vorschein kommen — nur wenig Wintererier mehr abgelegt werden; bald fängt dann die Periode der Sommereier an, wie aus dem Folgenden hervorgeht. Während von November bis zum 1. März auf Hunderten von Messungen nicht ein einziges Mal ein Durchschnittswert (berechnet nach je 3 Eimessungen) von 0,39—0,41 mm vorkommt, sind vom 7. März an 6,4 % der Eier von dieser Länge. Vom 22. Februar—1. März sind 25 % der Eier kleiner als 0,48 mm; vom 7.—31. März 56 %. Weiter sind die Eier mit mässig vorgeschrittener Entwicklung (Wintererier mit einer Länge von 0,49—0,60 mm) im März erheblich weniger zahlreich geworden (von 49 % im Februar auf 23 % im März). Wir sehen also, dass von Anfang März ab viele neue Eier abgelegt werden und zwar hauptsächlich Sommereier; dass die Zahl der mässig entwickelten Wintererier stark abnimmt, dass also die Zeit der Ablage der Wintererier beendet ist. Von Februar ab nehmen die Prozentsätze der eiertragenden Weibchen regelmässig zu, um im Frühling (April—

<sup>1)</sup> Unter Länge ist der Abstand vom Vorderende der Antennenschuppe bis zum Hinterende der Schwanzflosse zu verstehen.

<sup>2)</sup> Die Prozentsätze der eiertragenden Weibchen sind berechnet nach Zahlen, die nur Proben aus der I und II Zone (vgl. Abb. 3 und 4, Seite 68/69) entnommen sind.

Juni) ein Maximum zu erreichen (Zahlen in Abb. 1). Im Jahre 1928 liegt ein deutliches Maximum im April, 1927 sind die Zahlen im April, Mai und Juni ungefähr gleich gross. Von dann ab nehmen die Prozentsätze allmählich ab.

Um die Zeiten der Eiablage genauer zu bestimmen, ist es notwendig, auch die Entwicklungsstufen der Embryonen mit in Betracht zu ziehen. Um eine Uebersicht hierüber zu erhalten, ist in Tabelle 2 der monatliche Prozentsatz der eiertragenden Weibchen mit dem Prozentsatz, in welchem jedes Entwicklungsstadium in jedem Monat vorkommt, multipliziert; die so erhaltenen Zahlen geben also die absolute Häufigkeit der verschiedenen Entwicklungsstadien an.

Tabelle 2.

Die Häufigkeit der verschiedenen Entwicklungsstufen von Granateiern. Die Zahlen sind das Produkt der Prozentsätze, in welchen die eiertragenden Weibchen und derjenigen, in welchen die verschiedenen Entwicklungsstufen der Eier vorkommen.

| Entwicklungsstufen      |      | Okt. | Nov.              | Dez. | Jan. | Feb. | März | April | Mai  | Juni | Juli | Aug. | Sept. |
|-------------------------|------|------|-------------------|------|------|------|------|-------|------|------|------|------|-------|
| Ohne Pigment            | 1927 | 40   | 899 <sup>1)</sup> | 1755 | ..   | ..   | 2880 | 4556  | 2405 | 3196 | 2695 | 1720 | 432   |
|                         | 1928 | 180  | 4230              | 3626 | 3600 | 1188 | 4221 | 4543  | 2145 | 2806 | 1395 | 1334 | 217   |
| Mit Nauplius-<br>auge   | 1927 | 240  | 1426              | 1287 | ..   | ..   | 720  | 670   | 1300 | 680  | 1155 | 760  | 225   |
|                         | 1928 | 88   | 282               | 784  | 550  | 440  | 819  | 1386  | 1300 | 1403 | 630  | 580  | 154   |
| Mit Chroma-<br>tophoren | 1927 | 225  | 682               | 819  | ..   | ..   | 540  | 1206  | 2600 | 2584 | 1485 | 1400 | 252   |
|                         | 1928 | 132  | 188               | 441  | 650  | 418  | 945  | 1540  | 2470 | 1647 | 2160 | 870  | 287   |
| Aus-<br>schlüpfend      | 1927 | 0    | 62                | 0    | ..   | ..   | 270  | 201   | 130  | 264  | 165  | 120  | 9     |
|                         | 1928 | 0    | 47                | 49   | 200  | 110  | 315  | 231   | 520  | 244  | 315  | 116  | 42    |

Hieraus geht hervor, dass eine Vermehrung von neu abgelegten Eiern im November, März—April und Juni vorkommt, und dass es also 3 Hauptlaichperioden gibt; während im Januar, Februar, Mai und Juli—Oktober weniger Eier abgelegt werden als in den vorgehenden und folgenden Monaten.

Obiges ist im Wesentlichen in Uebereinstimmung mit den Angaben von EHRENBAUM, der eine Hauptperiode im April—Anfang Juli und eine zweite im Oktober—November angibt; da aber diese Perioden durch Unterschiede in der Grösse der Eier zu unterscheiden sind, kommt es mir vor, dass deren Umgrenzung am schärfsten zu ziehen ist durch Berücksichtigung dieser Tatsache. Die Zeit der Eiablage ist dann in 2

<sup>1)</sup> Für den November 1927 liegen nur 3 Proben vor.

Perioden zu teilen: die Periode der Wintereier von Ende Oktober bis Anfang März und die der Sommereier ununterbrochen fortdauernd von Anfang März bis Ende August; in letzterer sind noch 2 Maxima und zwar im April und Juni zu unterscheiden. Die relative Dauer der 4 Entwicklungsstadien der Eier ist sehr verschieden, sie lässt sich auf folgende Weise berechnen. Ueber das ganze Jahr gerechnet sind von allen untersuchten Eiern 50 % ohne Pigment, 18 % sind mit Naupliusaugen ohne Chromatophoren, 28 % haben Chromatophoren, 4 % sind als dem Ausschlüpfen nahe unterschieden. Weil diese Zahlen über ein ganzes Jahr berechnet sind, also den vollständigen Entwicklungsgang von Winter- und Sommereiern umfassen, ist das Verhältnis der Dauer der Stadien auch 50 : 18 : 28 : 4. Mit Hilfe dieser Zahlen ist es nun möglich zu schätzen wieviel Tage die Dauer der ganzen Eientwicklung ist. Die ersten Sommereier wurden 1928 am 7. März beobachtet; am 24. April wurden die ersten Chromatophoren auf den Embryonen in Sommereiern gefunden, die Dauer der 2 ersten Stadien war also 48 Tage und die ganze Entwicklung dauerte  $\frac{100}{68} \times 48 = 71$  Tage; die durchschnittliche Temperatur war 6°—7°. Wintereier wurden 1928 in erheblicher Zahl vom 15.—25. Oktober ab abgelegt, am 1. Dezember kommen in ungefähr gleicher Häufigkeit Embryonen mit Chromatophoren vor; diese brauchten dazu 40 Tage und die Dauer der ganzen Entwicklung würde  $\frac{100}{68} \times 40 = 59$  Tage bei einer Temperatur von 10° sein. Zu ungefähr demselben Wert (mit Beachtung der Temperatur) komme ich durch die Beobachtung, dass am 8. November die ersten Embryonen mit Naupliusaugen vorkommen; das erste Stadium brauchte dann 19 Tage und die ganze Entwicklung 38 Tage, bei einer Temperatur von 12°. Embryonen, die dem Ausschlüpfen ganz nahe waren, kamen 1928 vom 12. Dezember ab vor, und abgelaichte Weibchen vom 4. Januar ab. Nehmen wir an, dass die ersten Larven also vom 28. Dezember ab ausschlüpfen, dann ist die ganze Entwicklungsdauer 69 Tage. Die 2 letzten Stadien haben dann 27 Tage gedauert (bei 5°—6°) und die ganze Dauer würde bei dieser Temperatur 90 Tage sein.

Für höhere Temperaturen sind folgende Zahlen zu nennen: die letzten Sommereier wurden 1928 am 2. Oktober gefunden, spätestens den 11. September wurden noch Eier gefunden, die vor kurzem abgelegt waren, vielleicht am 8. September, die Dauer der 3 ersten Stadien war also 24 Tage, von allen 4 Stadien 25 Tage bei einer Temperatur von  $\pm 16^\circ$ ; dieselbe Berechnung ergab für 1927 34 Tage bei einer Temperatur von  $\pm 16^\circ$ . Dieser Wert findet von ganz anderer Seite eine kräftige



Bestätigung und zwar in einem Experiment von EHRENBAUM, der angibt, dass im Sommer in einem möglichst kühl gehaltenen Aquarium die Entwicklung der Eier sich in 4—5 Wochen vollzieht. Wenn man diese Zahlen für die Dauer und die Temperatur in einer graphischen Darstellung zusammenfasst (Abb. 2), zeigt es sich, dass die Werte ziemlich regelmässig geordnet sind und die Konstruktion einer Kurve ermöglichen, die das Verhältnis zwischen Temperatur und Entwicklungsdauer angibt. Obwohl die Beobachtungen nicht genügend zahlreich sind, um Sicherheit zu geben — eine Kontrolle durch Aquariumversuche bei verschiedenen Temperaturen wäre noch sehr erwünscht — so glaube ich doch, dass die Kurve ungefähr richtig ist, um so mehr weil das Verhältnis zwischen Temperatur und Dauer ungefähr dasselbe ist als bei der Dauer

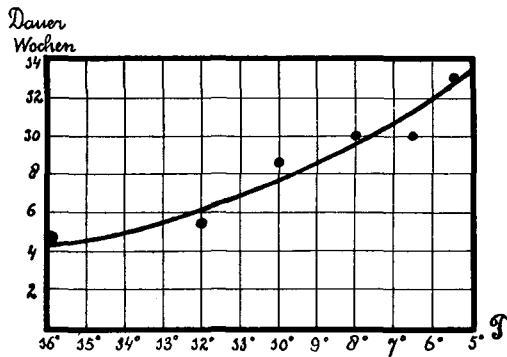

Abb. 2. Die Dauer der Eireifung bei verschiedener Temperatur.

der Larvenstadien vom Hummer (und zwar eine etwas mehr als  $2 \times$  längere Dauer bei  $10^\circ$  niedrigerer Temperatur). Die Zeit, in welcher die Eier hauptsächlich vorkommen (November—August), könnte man in Bezug auf die Temperatur in 3 Perioden teilen und zwar Dezember—März — in welcher Zeit die Tiere, und namentlich die eiertragenden Weibchen, sich in die Nordsee zurück gezogen haben — mit einer durchschnittlichen Temperatur von  $\pm 5^\circ$ — $6^\circ$ , eine vom April, Mai und November mit  $9^\circ$  und eine vom Juni—August mit  $16^\circ$ . Die Entwicklungsdauer der Eier wäre bei  $5^\circ$ — $6^\circ$  auf 13 Wochen, die bei  $9^\circ$  auf 9 Wochen und bei  $16^\circ$  ungefähr auf 4,5 Wochen zu stellen sein; die durchschnittliche Dauer ist dann 9,2 Wochen. Durchschnittlich waren vom Februar 1928—Januar 1929 (aber September und Oktober nicht mitgerechnet) in der ganzen Westerschelde — auch die Bezirke mitgerechnet, in denen wenig oder fast keine Weibchen mit Eiern vorkommen — 41% der Weibchen von mehr als 50 mm Länge mit Eiern besetzt. Um diesen Prozentsatz

zu erhalten, müssen  $\frac{41}{100} \times \frac{43}{9,2}$  (d. i. 52 Wochen—September & Oktober)

= 1,9 Mal im Jahr Eier abgelegt werden. Dieser Prozentsatz ist berechnet auf Weibchen mit einer Länge von über 50 mm. Würde derselbe aber auf eine grössere Länge z. B. von über 60 mm berechnet sein, dann würde der Prozentsatz erheblich grösser und zwar 69,7. Um diesem Prozentsatz zu erhalten, sollen  $\frac{69,7}{100} \times \frac{43}{9,2} = 3,2$  Mal (also ungefähr 3 Mal) im

Jahre Eier abgelegt werden. Nun sind die Schätzungen zwar roh aber die Fehler sind doch nicht so gross, dass ein solcher Prozentsatz zu bekommen wäre bei einer zweimaligen Eiablage im Jahr; für die Dauer der Eireifung müsste dann ein Wert von ungefähr 15 Wochen gefunden sein und das ist völlig unvereinbar mit meinen Zahlen und mit dem Aquariumversuch von EHRENBAUM. Wir können also berechnen, dass die kleineren (51—61 mm langen) Granatweibchen 2 Mal im Jahr, die grösseren 3 Mal im Jahr Eier ablegen. In Wirklichkeit sind die Verhältnisse jedoch anders als hier beschrieben ist: die kleinen Weibchen von z. B. 55 mm Länge treten bei der Häutung nach der 1. Eiablage in die zweite Kategorie von mehr als 60 mm Länge über und legen dann wahrscheinlich vor dem Oktober noch 2 Mal Eier ab. An ihrer Stelle kommen in die erste Kategorie Weibchen, die im November noch nicht geschlechtsreif waren und die vor dem Oktober deshalb nur 2 Mal oder selbst nur 1 Mal Eier ablegen.

Es gibt noch eine weitere Andeutung, dass die grösseren Weibchen 3 Mal im Jahr Eier erzeugen. Die grossen Prozentsätze dieser eiertragenden Weibchen im Winter weisen daraufhin, dass sie alle 1 Mal Winter eier ablegen. Die Periode der Wintereier dauert von Ende Oktober—Anfang März, also 5 Monate, die Sommerperiode wenigstens gleich lang, die Temperatur ist aber so viel höher, dass die Entwicklungsdauer ungefähr 2 × kürzer ist und doch sind die Prozentsätze der Weibchen mit Sommereiern in diesen 5 Monaten höher als in den Wintermonaten. Um diese Prozentsätze zu erhalten, werden also auch 2 × im Sommer Eier abgelegt werden müssen. Ich glaube also sagen zu dürfen, dass alle im November—Dezember geschlechtsreifen Granatweibchen 3 Mal im Jahr Eier ablegen.

Die Weibchen, welche im Januar schon abgelaicht sind, werden für das 2. Mal im März wieder Eier ablegen (Sommereier), welche für ihre Entwicklung nicht mehr als 10 Wochen brauchen, so dass sie Mitte Mai wieder abgelaicht sind. Im Juni oder Juli werden diese dann zum 3. Mal Eier erzeugen. Weibchen, welche im Herbst oder Winter später angefangen sind, werden vielleicht auch das 2. und 3. Mal später kom-

men (Mai, bezw. Ende Juli und August); bei diesen dauert die 2. Periode aber kürzer, weil sie später im Jahr und also bei höherer Temperatur fällt. Es kommen geschlechtsreife Weibchen vor mit einer Länge von 49 mm ab (ausnahmsweise selbst bei 43 mm), die meisten legen aber erst Eier ab, wenn sie 55—57 mm Länge erreicht haben.

Es gibt zwar keine scharfen Unterschiede in der Zeit der Eiablage von grösseren und kleineren Weibchen, einige geringere treten jedoch hervor. Im November bis in den Januar legen verhältnismässig wenig kleine Weibchen Eier ab. Dagegen werden die ersten Sommererier im März bei den kleinen Weibchen — von denen verhältnismässig viele noch unter 51 mm (selbst bis zu 43 mm) sind — sichtbar, diese legen offenbar zum ersten Mal Eier ab. Während im November—Januar ungefähr zweimal soviel grosse Weibchen mit neuabgelegten Eiern vorkommen als kleine, ist Anfang März dieses Verhältnis gerade umgekehrt (Tabelle 3).

Tabelle 3.

Prozentsätze der verschiedenen Entwicklungsstadien der Eier bei Weibchen, kleiner und grösser als 60 mm.

| Grösse | Entwickl.<br>d. Eier | Nov. |      | Dec.  |      | Jan. |       | März  |      | Apr.  |      | Mai   |      | Juni  |      | Juli  |  |
|--------|----------------------|------|------|-------|------|------|-------|-------|------|-------|------|-------|------|-------|------|-------|--|
|        |                      | 1-15 | 1-15 | 16-31 | 1-15 | 1-15 | 16-31 | 16-30 | 1-15 | 16-31 | 1-15 | 16-30 | 1-15 | 16-30 | 1-15 | 16-31 |  |
| <60 mm | Ohne                 | 36   | 37   | 40    | 12   | 66   | 54    | 52    | 58   | 51    | 55   | 39    | 53   | 19    |      |       |  |
| >60 mm | Pigment              | 63   | 62   | 59    | 88   | 33   | 44    | 49    | 41   | 49    | 45   | 60    | 47   | 81    |      |       |  |
| <60 mm | Mit Nau-             | 0    | 24   | 27    | 10   | 55   | 35    | 45    | 34   | 49    | 65   | 47    | 41   | 45    |      |       |  |
| >60 mm | plusauge             | 99   | 77   | 72    | 90   | 46   | 66    | 54    | 67   | 50    | 34   | 54    | 59   | 55    |      |       |  |
| <60 mm | Mit Chro-            | 20   | 20   | 34    | 34   | 24   | 53    | 50    | 42   | 45    | 54   | 54    | 72   | 36    |      |       |  |
| >60 mm | matophor.            | 80   | 79   | 67    | 66   | 76   | 47    | 51    | 59   | 54    | 45   | 47    | 28   | 64    |      |       |  |

Ein Versuch zum Erklären dieser Tatsache wird auf S. 77 gegeben. Die kleinen Weibchen, welche im März zum ersten Mal Eier ablegen, sind bei der folgenden Eiablage zum grössten Teil in die Kategorie der Grossen übergetreten, und die dadurch entstehende Lücke in den Reihen der Kleinen wird nicht vollständig wieder aufgefüllt, denn von Ende Juni bis September gehören die eiertragenden wieder zum grössten Teil zu den grossen Weibchen. Die Weibchen, welche im Sommer eine Länge von 50—60 mm erreichen, werden daher nicht geschlechtsreif vor Oktober—November, sind dann aber auch so gross geworden, dass sie zur Kategorie der grossen Weibchen zu rechnen sind. Diese sind es wahrscheinlich, die in November und Anfang Oktober die Periode der Winter-Eiablage anfangen, denn es ist auffallend, dass die ersten

Eiertragenden Weibchen hauptsächlich zu den mittelgrossen Tieren (57—67 mm) gehören, während später (Ende Dezember—Januar), weil viele sehr grosse hinzukommen, die Hauptmenge von den grossen Weibchen gebildet wird. Es ist also wahrscheinlich, dass sowohl beim

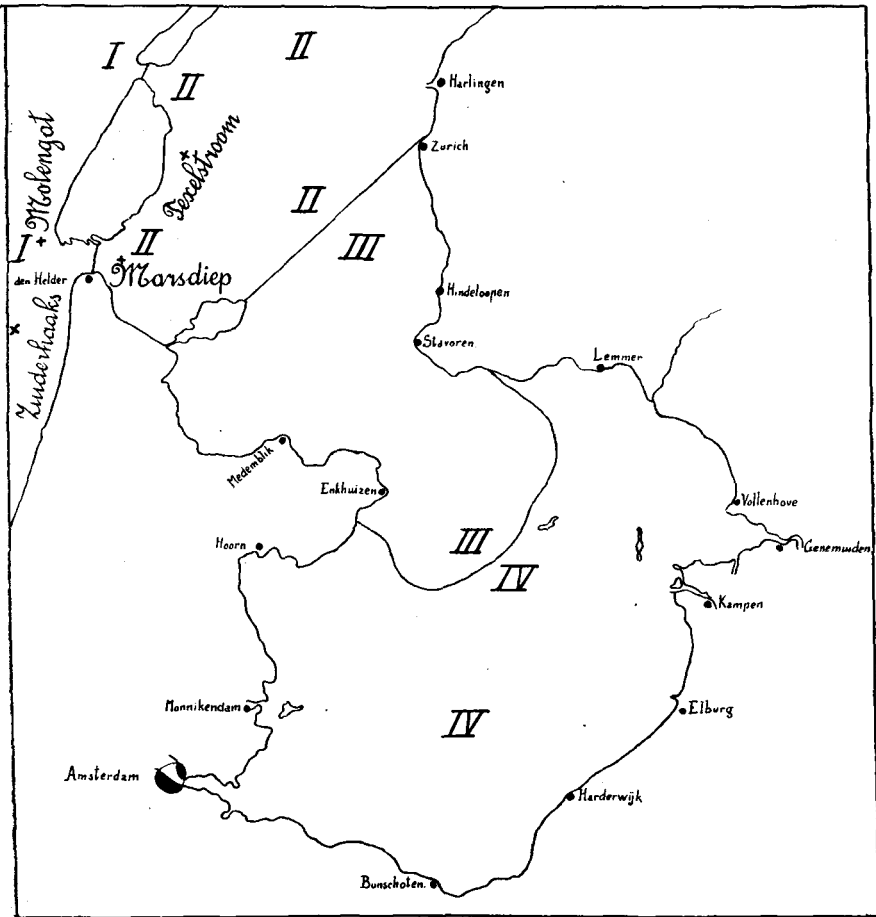

Abb. 3. Das Beobachtungsgebiet der Zuidersee und die Teilung in Zonen I—IV.

Anfang der Wintereier-, wie bei dem der Sommereierperiode die Weibchen voran gehen, welche zum ersten Mal geschlechtsreif werden.

Die verschiedenen Bezirke wurden in Zonen geteilt (I—IV; Abb. 3 und 4), die hauptsächlich durch Unterschiede von den Fortpflanzungsverhältnissen zu unterscheiden sind. Im Abschnitt »Wanderungen« wird es sich aber zeigen, dass dieselbe Einteilung auch dabei wiederholt zu benutzen ist, so dass sie als eine natürliche gelten kann.

- I. Zone: in dieser schlüpfen die Larven sowohl im Winter wie im Sommer aus;  
 II. Zone: reife Eier kommen nur im Sommer (vom April ab) vor;  
 III. Zone: Weibchen mit Eiern kommen vor, aber die Eier werden hier nicht reif;  
 IV. Zone: eiertragende Weibchen fehlen das ganze Jahr hindurch.

Die Grenzen der Zonen sind in den Karten angegeben, sie sind selbstverständlich in Wirklichkeit nicht so scharf wie hier angegeben und Temperatur und Salzgehalt können ihre Lage in starkem Masse beeinflussen. Die Grenzen der Zonen sind in der Westerschelde am schärfsten anzugeben; hier nimmt in einem beschränkten Gebiet der Salzgehalt

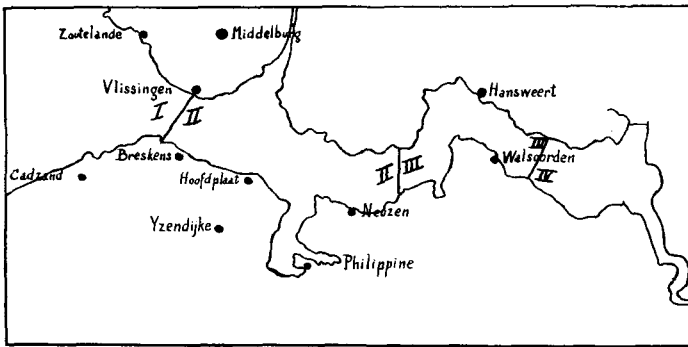

Abb. 4. Das Beobachtungsgebiet in der Westerschelde und die Teilung in Zonen I—IV.

flussabwärts ganz allmählich regelmässig zu. Schwieriger wird es im Zuiderseegebiet, dessen Oberfläche so gross ist, dass eine gute Uebersicht nur durch eine ungeheure Anzahl von Proben zu erhalten wäre; die Grenzen namentlich zwischen II und III sind hier dann auch nur als annähernd richtig zu betrachten. Im Haringvliet ist der Versuch die Grenzen anzugeben nicht gemacht; durch die grossen Schwankungen, die hier im Salzgehalt vorkommen können, ist das fast ganz unmöglich.

Ich habe angenommen, dass die Larven ausschlüpfen an Stellen, wo hohe Prozentsätze von Eiern vorkommen, in welchen die Embryonen grosse sternförmige Chromatophoren und wohl entwickelte Gliedmassen haben und die bei durchschnittlicher Temperatur in höchstens einer Woche ausschlüpfen.

Im Sommer kommen reife Eier ziemlich weit flussaufwärts vor; das spezifische Gewicht des Wassers ist an der Obergrenze ungefähr 1,019. Im Winter dagegen ziehen die Weibchen mit reifen Eiern sich in die

Nähe des Meeres zurück und je tiefer die Temperatur in den Flussmündungen sinkt, um so weiter entfernen sie sich aus diesen. Ende Januar und Anfang Februar findet man reife Eier in erheblicher Menge nur einige Meilen von der Küste in der Nordsee. Im Abschnitt »Wanderungen« wird dies weiter Erwähnung finden. Wenn im Februar oder März die Granat wieder flussaufwärts ziehen, befinden sich unter ihnen auch eiertragende Weibchen, und vom April ab findet man auch in der II. Zone reife Eier, und im Sommer in einer Anzahl nicht viel kleiner als in der I. Zone.

Ein ausgedehntes Laichgebiet in der II. Zone bildet der nördliche Teil der Zuidersee, das im Sommer von einer grossen Menge Granat bevölkert wird, der zu einem bedeutenden Teil aus Weibchen besteht, welche mit allen Entwicklungsstufen von Eiern besetzt sind.

Die Begattung der Weibchen findet kurze Zeit nach der Häutung statt, und obgleich nicht jede Häutung mit der Fortpflanzung im Verbindung steht, so kann die Häufigkeit, mit welcher eben gehäutete Weibchen vorkommen, uns einigermaßen eine Andeutung geben, in welcher Zeit und an welchen Orten die Begattung stattfindet. In Tabelle 4 ist eine Anzahl Beobachtungen über das Vorkommen von eben gehäuteten Granatweibchen vereinigt; als eben gehäutet wurden betrachtet Tiere, die sich noch weich anföhlten; ein ziemlich subjectives Mass also. Die Zahlen zeigen ziemlich grosse Unregelmässigkeiten und Unterschiede in den

Tabelle 4.

Häufigkeit von eben gehäuteten Granatweibchen, über 50 mm lang, berechnet in Prozenten auf die nicht eiertragenden Weibchen über 50 mm und auf das Total, die eiertragenden mitgerechnet: Zahlen ( ).

| Monat           | Zuidersee | Haringvliet | Westerschelde | Im Durchschnitt |
|-----------------|-----------|-------------|---------------|-----------------|
| Februar .....   | ..        | 2 (2)       | ..            | 2 (2)           |
| März .....      | 25 (10)   | 10 (6)      | 8 (5)         | 14 (7)          |
| April .....     | 23 (7)    | 14 (5)      | 21 (7)        | 19 (6)          |
| Mai .....       | 16 (5)    | 39 (10)     | 10 (5)        | 22 (7)          |
| Juni .....      | 11 (6)    | 19 (8)      | 11 (4)        | 14 (6)          |
| Juli .....      | 6 (3)     | 12 (6)      | 2 (1)         | 7 (3)           |
| August .....    | ..        | 1 (0)       | 5 (3)         | 3 (1)           |
| September ..... | ..        | 6 (6)       | 3 (3)         | 4 (4)           |
| Oktober .....   | 18 (17)   | 28 (15)     | 9 (7)         | 17 (13)         |

3 Bezirken, was zum Teil davon herrührt, dass die Zahl der grossen Weibchen (ohne Eier) in vielen Proben gering ist, zum Teil auch davon, ob

die Proben in frischem oder konserviertem Zustand untersucht wurden. Eine Tatsache geht jedoch mit grosser Deutlichkeit aus der Tabelle hervor und zwar diese, dass, während im August und September eine geringe Zahl Häutungen vorkommt, diese Zahl im Oktober plötzlich sehr gross wird. Ohne Zweifel wird dies im Verbindung stehen mit der in Ende Oktober und Anfang November fallenden Eiablage. Die Begattung geht der Eiablage also einige Zeit und zwar 2—4 Wochen voran.

Auch den ganzen Frühling hindurch findet man hohe Prozentsätze von eben gehäuteten Weibchen; dies ist ein Beweis dafür, dass die Weibchen nach der ersten Eiablage sich häuten und aufs Neue begattet werden. Während es wohl sicher ist, dass bei den hohen Sommertemperaturen (Juli—September) das Wachstum der Weibchen schneller vor sich geht wie im Frühling, ist die Zahl der Häutungen im Frühling doch viel grösser. Wir müssen also annehmen, dass die Häutungen nicht nur hervorgerufen werden durch das Bedürfnis zur Grössenzunahme sondern auch durch das zur Begattung. Man könnte also unterscheiden zwischen einer Wachstums- und Fortpflanzungshäutung. Es wäre interessant durch Aquariumsversuche zu erforschen, ob bei jener auch eine stärkere Grössenzunahme stattfindet wie bei dieser.

Es hat sich gezeigt, dass der Prozentsatz der eben gehäuteten Weibchen auch in der IV. Zone hoch sein kann; dies und der Umstand, dass die Männchen im Spätsommer und Herbst sich in dieser IV. (und III.) Zone in grosser Zahl zeigen, machen es sehr wahrscheinlich, dass die Begattung auch im Brackwasser stattfindet und namentlich auch während des Zuges der Weibchen zu den salzreicheren Gewässern, der im Herbst stattfindet.

Aus fischereilicher Hinsicht ist es nicht nur wichtig, dass jedes Jahr eine grosse Menge Weibchen für die Fortpflanzung geschont wird, sondern auch die Grösse der Tiere ist von Wichtigkeit. Bei kleinen und mittelgrossen Tieren nimmt die Zahl der Eier im Verhältnis zur Länge der Weibchen so zu, dass bei 1 mm Längezunahme die Zahl der Eier mit 7,4 % zunimmt oder bei 10 mm Längezunahme 2 Mal grösser wird, nur bei den sehr grossen Tieren ist die Zahl der Eier nicht so gross wie aus dieser Formel hervorgehen würde (Tabelle 5).

Tabelle 5.  
Eizahl beim Granat von verschiedener Länge.

| Länge<br>(von Rostrum-Telson) | Zahl der Eier | Länge<br>(von Rostrum-Telson) | Zahl der Eier |
|-------------------------------|---------------|-------------------------------|---------------|
| 40 mm                         | 1560          | 65 mm                         | 8820          |
| 50 -                          | 3120          | 70 -                          | 11500         |
| 60 -                          | 6240          | 75 -                          | 14200         |

### Wachstum.

Im Allgemeinen sind wir über die Wachstumsgeschwindigkeit der Krebstiere, auch der wirtschaftlich wichtigen Arten, nur sehr unvollkommen unterrichtet. Das Fehlen von Altersmerkmalen und die periodische Grössenzunahme machen oft einen klaren Einblick in die Wachstumsverhältnisse unmöglich, während dieser durch Markierungsversuche auch nicht zu erhalten ist. Für den Granat kommen dann noch 2 besondere Schwierigkeiten hinzu und zwar seine grosse Beweglichkeit, so dass man das Wachstum derselben Tiere an einem bestimmten Ort nicht durch Messungen verfolgen kann und zweitens der Umstand, dass die Laichperiode sich fast über das ganze Jahr fortsetzt. Es ist dadurch, auch wenn man über eine enorme Anzahl Messungen verfügt, ausserordentlich schwer, die Längengrenzen der verschiedenen Jahresklassen zu bestimmen. Es gibt wohl Vermutungen, wenn man sich längere Zeit mit Granat bemüht, aber Genauigkeit und Sicherheit sind schwerlich zu erhalten.

EHRENBAUM gibt einige Angaben über Alter und Länge, aber dieselben sind nicht sehr ausführlich, so dass eine Nachprüfung an dieser Stelle seinen Wert haben kann.

Bei den Messungen müssen immer die Männchen und Weibchen auseinander gehalten werden, weil jene bedeutend kleiner bleiben; wir werden uns hier erst beschäftigen mit den Weibchen. Eine Uebersicht der Messungen von den Weibchen gibt Abb. 5, wo alle Messungen nach Monaten geordnet, graphisch dargestellt sind und zwar für die Jahre 1927 und 1928 gesondert. Es fällt auf, welchen unregelmässigen Zickzackverlauf diese Linien haben. Gipfel, welche in einem Monat sehr hoch sind, können in einem folgenden gar nicht oder nur mit Mühe zu unterscheiden sein. Das hängt damit zusammen, dass oft die Granat von einer beschränkten Längengruppe Vorliebe für bestimmte Fangstellen zeigen, kurze Zeit später aber von einer anderen Gruppe ersetzt sind. Auf diese Weise findet man an derselben Fangstelle oft starke Unterschiede in der Grösse; sind dann auch noch die Fangstellen nicht dieselben, dann wird es begreiflich, dass eine so grosse Variation in der relativen Häufigkeit der verschiedenen Längengruppen, in der Höhe der Gipfel in der graphischen Darstellung also, vorkommen kann. Ich habe versucht, soviel wie möglich jeden Gipfel in einem Monat mit dem Gipfel bei der nächstfolgenden Länge im folgenden Monat zu verbinden; oft ist die Linie senkrecht oder sie müsste sogar zurücklaufen, nur sehr wenige Gipfel müssten völlig vernachlässigt werden. Die Linien zwischen den Gipfeln in den aufeinander folgenden Monaten stellen also das Wachstum der am häufigsten vorkommenden Längengruppen vor. Es



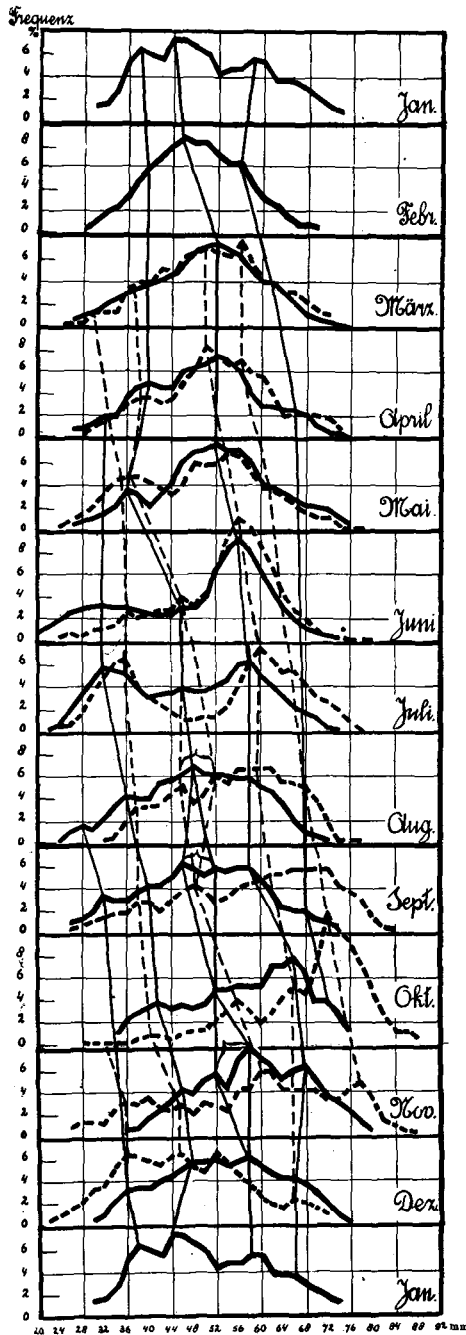

Abb. 5. Länge von Granatweibchen in den verschiedenen Monaten des Jahres. Die gezogene Linie bezieht sich auf 1928, die gebrochene auf 1927. Weil vom Januar 1927 und 1928 keine Messungen vorliegen, ist die Linie für 1929 gegeben und zwar sowohl am Anfang wie am Ende der Figur. Die senkrechten dünnen Linien verbinden soviel wie möglich die Gipfel in den aufeinander folgenden Monaten.

sind 5 solche Wachstumslinien zu unterscheiden, von denen 2 erst im Laufe des Jahres beginnen. Eine Schwierigkeit bilden die Gipfel im Mai in beiden Versuchsjahren. Diese stark hervortretenden Gipfel schliessen weder bei den vorgehenden noch bei den folgenden an. Ich habe angenommen, dass hier 2 Altersgruppen vorkommen, die so wenig in Länge von einander verschieden sind, dass die 2 Gipfel zu einem zusam-

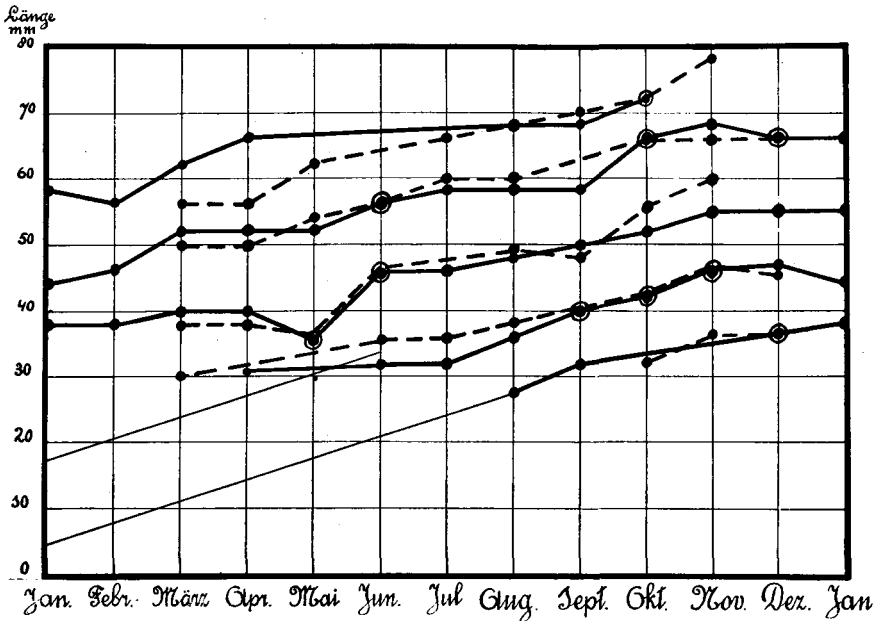

Abb. 6. Wachstum der verschiedenen Längengruppen von Granatweibchen im Laufe des Jahres. Die Linien sind dieselben wie die senkrechten Linien in Abb. 5. Die dünnen Linien sind extrapoliert.

menfliessen. Bisweilen habe ich angenommen, dass eine Gruppe durch 2 Gipfel vorgestellt wurde (z.B. August 1927, September 1928 und November 1928). Einer deutlicheren Uebersicht halber habe ich die Verbindungslinien über  $90^\circ$  gedreht und in Abbildung 6 auf anderem Masstab wieder gezeichnet.

Es zeigt sich, dass die Linien in den beiden Versuchsjahren in guter Uebereinstimmung mit einander sind und wenn die Unebenheiten in den Linien egalisiert werden, zeigen diese einen fast parallelen Verlauf. Es fragt sich nun, welche Altersklassen die Linien vorstellen und zur Beantwortung werden wir mit den beiden unteren anfangen, die also die jüngsten Tiere in den Fängen darstellen; Fänge mit sehr feinmaschigen Netzen in denen auch noch kleinere Tiere zu fangen wären, stehen leider nur in geringer Zahl zur Verfügung. Extrapoliert man nun

die Egalisierungslinien durch gerade Linien<sup>1)</sup> ungefähr in deren Verlängerung, dann schneidet die untere Linie die wagerechte Linie für 5 mm — dies ist die Länge des 1. Jugendstadiums nach der Larvenzeit — ungefähr beim Januar und die obere ungefähr beim August. Danach glaube ich zu der Annahme berechtigt zu sein, dass erstere sich bezieht auf Tiere, welche von Wintereiern herstammen, letztere von Sommeriern. Der erste Schneidepunkt liegt zwar etwas zu früh im Jahr, aber das rührt wohl daher, dass beim Fang eine Selektion ausgeübt wird und nur die grössten Tiere der jüngsten Altersklassen gefangen werden, wodurch auch die Wachstumsgeschwindigkeit grösser ist als sie zu sein scheint, denn der Einfluss der Selektion wird mit dem Heranwachsen der Tiere immer kleiner. Deshalb ist auch die Linie für die Tiere von Sommeriern vom Juni ab und nicht vom März ab, dem Erscheinen der ersten Tiere in den Fängen, extrapoliert. Eine andere Möglichkeit wäre, dass die kleinsten Granat — die untere Linie — Sommerlarven wären; die Wachstumsgeschwindigkeit müsste dann aber eine so grosse sein, dass sie völlig verschieden wäre von den sonstigen Altersgruppen. Dass die obere der 2 hier behandelten Linien Winterlarven desselben Jahres wären, ist wohl ganz unmöglich; die im Juni ungefähr 32 mm langen Tiere werden in den vorgehenden 4 Monaten ungefähr gleich schnell gewachsen sein wie die im August zuerst erscheinenden Tiere, die von dann ab bis November von  $\pm 28$  mm zu  $\pm 36$  mm also 8 mm aufgewachsen sind. Die im Juni 32 mm langen Tiere waren also im Februar schon 24 mm lang und eine solche Länge können die frühestens Anfang Januar geborenen Winterlarven bei einer niedrigen Temperatur unmöglich erreicht haben. Wir können also mit ziemlich grosser Sicherheit annehmen, dass die obere der 2 Linien Sommerlarven des vorigen Jahres und die untere Winterlarven desselben Jahres vorstellt. Eine ähnliche Extrapolation bei der 3. Linie von unten kann nur auf eine sehr beschränkte Genauigkeit Anspruch machen; sie würde einen Schneidepunkt für das Ende der Larvenzeit noch vor dem Oktober geben; derselbe Fehler der auch bei einer obigen Extrapolation einen zu frühen Wert gab, wird hier noch grösser sein. Ein grosser Wert ist daher in diesem Fall der Extrapolation nicht zuzuschreiben, sie kann nur einen Hinweis geben, dass die 3. Gruppe aus Winterlarven besteht.

<sup>1)</sup> Eine gerade Linie ist zwar nicht eine genaue Wachstumslinie, aber über das ganze Jahr gerechnet ist in den 3 oberen Linien der Unterschied davon nicht gross. Es ist nicht ohne Bedeutung, dass die gerade Linie denselben Verlauf hat, wie EHRENBaum angibt für die Wachstumsgeschwindigkeit der Granatlarven; diese nehmen in 4—5 Wochen von 1,8 mm bis zu 5 mm in Länge zu; wir müssen dann annehmen, dass dies für die durchschnittliche Jahrestemperatur gültig ist.

Dies ist auch darum sehr wahrscheinlich, weil ihre Länge beim Anfang der Linie (Januar) gut anschliesst an die Länge, die die 1. (unterste) Gruppe in der Figur im Dezember erreicht hat. Dieselbe Uebereinstimmung findet man auch zwischen dem Anfang der 4. Gruppe (von unten ab gerechnet) und dem Ende der Linie der 2. Gruppe im Dezember. Dasselbe ist göltig für die 3. und 5. Linie. Zusammenfassend glaube

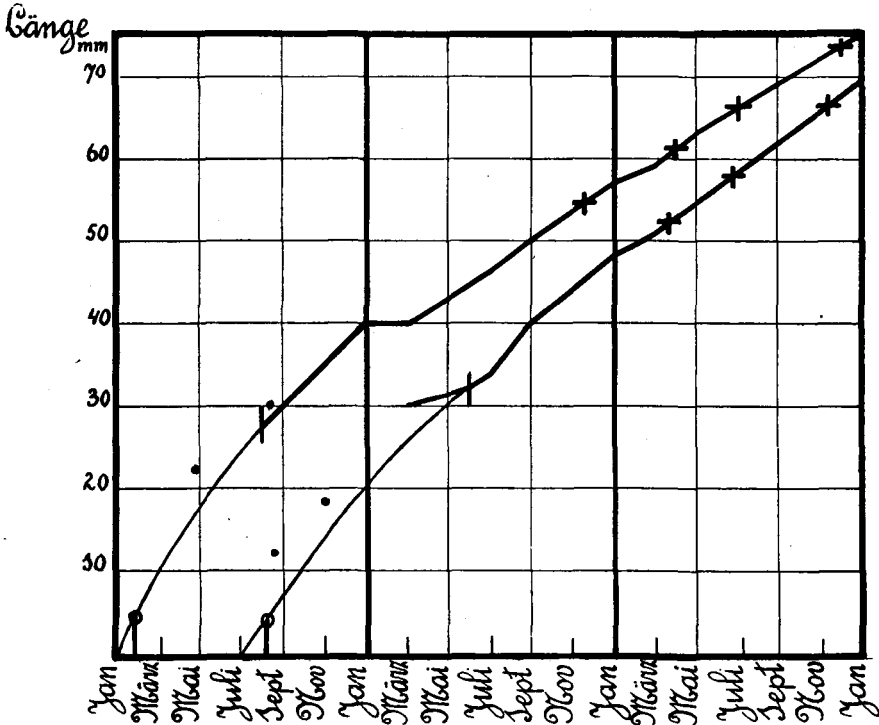

Abb. 7. Wachstum von Granatweibchen; die obere (bezw. untere) Linie wurde durch Aneinanderreihen der egalisierten 1., 3. und 5. (bezw. 2. und 4.) Linie von unten in Abb. 6 zusammengesetzt; die obere bezieht sich auf Tiere, die von Winteriern, die untere auf Tiere, die von Sommereiern herkommen. Die dünnen Teile der Linien sind extrapoliert; die  $\infty$  geben das Ende der Larvenzeit an; die ++ die Zeit der jedesmaligen Eiablage, die .. die durchschnittlichen Längen von kleinen, mit einer feinschichtigen Kurre gefangenen Tieren.

ich also zu der Annahme berechtigt zu sein, dass der Granatbestand, wie er in den Fängen vorkommt, durch Messung in Gruppen aufgeteilt werden kann, welche je von Winter- und Sommereiern abzuleiten sind. In Abb. 7 sind die Linien 1, 3, 5 und 2, 4 zu je einer zusammengestellt; die 2 so erhaltenen Linien geben dann das Wachstum von je Winter- und Sommerlarven über ungefähr 2 Jahre wieder. Bei den extrapolierten

Teilen der Linien sind noch die Ergebnisse von einigen Fängen mit feinmaschigen Kurren eingezeichnet. Sie geben Grund zu der Annahme dass die Extrapolation jedenfalls nahezu richtig ist. Die aus den Winter-eiern geborenen Tiere, welche im Januar anfangen zu erscheinen, sind im Januar des folgenden Jahres 40 mm lang, im Laufe dieses Jahres erreichen sie eine Länge, in der sie geschlechtsreif werden (die Linie kommt oberhalb der 50 mm) und im November legen sie zum ersten Mal Eier ab, ungefähr im März zum 2. Mal und im Juli zum 3. Mal. Die im Sommer geborenen Tiere sind im Januar 21 mm lang, im Januar

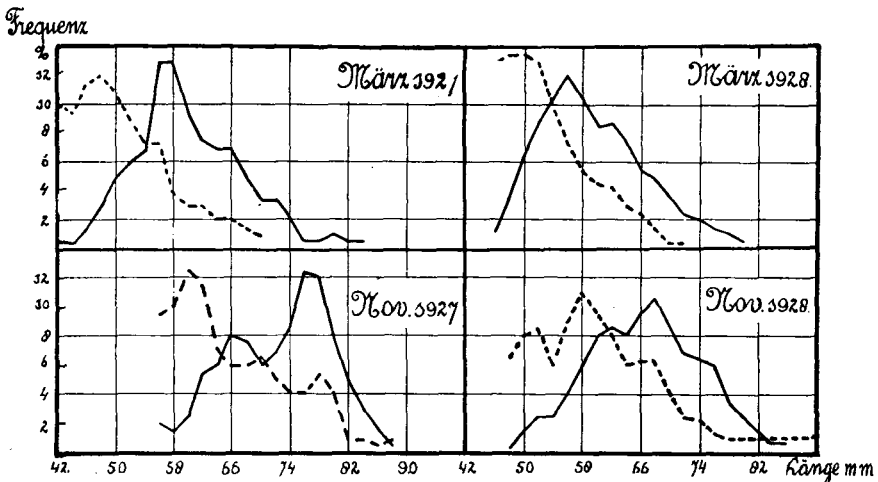

Abb. 8. Die Längen-Frequenzen von eiertragenden (gezogene Linien) und nicht eiertragenden (gebrochene Linien) Granatweibchen je von derselben Länge ab gerechnet, im März und November 1927 und 1928.

des folgenden Jahres 48 mm; sie werden im darauf folgenden März zum 1. Mal geschlechtsreif und im Juni oder Juli zum 2. Mal. Die im Sommer geborenen Tiere fangen ihre Geschlechtsreife also mit dem Ablegen von Sommereiern, die aus Winter-eiern herstammenden mit dem von Winter-eiern an. Wenn diese Annahme richtig ist, dann müssen, wie aus Abb. 7 zu ersehen ist, unter den eiertragenden Weibchen im März kleinere Individuen vorkommen als im November. Man findet das in den Messungen auch tatsächlich bestätigt; im März sind eiertragende Weibchen kleiner als 54 mm in viel grösserer Zahl vorhanden als im November, während in jenem Monat selbst bei einer Länge von 42 mm Eier angetroffen werden (Abb. 8). Aber nicht nur kommen im März kleinere eiertragende Weibchen vor, auch die durchschnittliche Grösse ist dann geringer. Wie Abb. 7 zeigt, legen dann Weibchen mit

einer Länge von 52 und 61 mm Eier ab und dazu Tiere, welche ein Jahr älter sind; diese kommen aber so wenig mehr in den Fängen vor, dass sie statistisch fast keine Bedeutung mehr haben. Im November dagegen werden Weibchen von 55 mm und dazu die noch ziemlich reichlich vertretenen Gruppen von 66 mm und 73 mm geschlechtsreif. In Tabelle 6 wird ein Vergleich von den Längen in November und März gegeben wie sie aus Abb. 7 abzulesen sind und die Längen, wie sie tatsächlich gefunden sind. Es zeigt sich dann, dass die Uebereinstimmung in den

Tabelle 6.

Länge von eiertragenden Granatweibchen im November und März, wie sie aus Abb. 7 zu berechnen ist im Vergleich mit den wirklich gefundenen Werten.

|                        | November |       |       | März  |       |       |       |
|------------------------|----------|-------|-------|-------|-------|-------|-------|
|                        | 55 mm    | 66 mm | 73 mm | 52 mm | 61 mm | 73 mm | ..    |
| Länge nach Abb. 7 ..   | 55 mm    | 66 mm | 73 mm | 52 mm | 61 mm | 73 mm | ..    |
| Tatsächlich { 1928.... | 62 —     | 68 —  | 76 —  | 56 —  | 62 —  | ..    | 78 mm |
| gefunden: { 1927....   | 62 —     | 66 —  | 76 —  | 56 —  | 66 —  | 72 —  | 80 —  |

meisten Fällen gut ist, nur liegen die kleinsten wirklich gefundenen Werte in beiden Monaten höher als die berechneten, was daraufhin weist, dass nur die grösseren Tiere dieser Gruppen geschlechtsreif werden. Auch in dieser Hinsicht zeigt sich ein Unterschied zwischen März und November: im Abb. 8 sind die Längen der Weibchen mit und ohne Eier dargestellt, man ersieht daraus nicht nur, dass von den kleinen Tieren die Prozentsätze der nicht Eiertragenden viel grösser sind, aber auch dass dieses Verhalten im März von 54 mm ab umgekehrt wird, im November dagegen erst bei 62 mm (1928) und bei 66 mm (1927).

Bei der Besprechung der Wanderungen wird daraufhin gewiesen werden, dass im Brackwassergebiet im Laufe des Sommers regelmässig neue Zuwanderung stattfinden muss. Der Granat, der sich im April in grösseren Mengen in der Zuidersee zu zeigen pflegt, bestand im Jahre 1928 hauptsächlich aus Tieren von 38—48 mm Länge, zum grössten Teil werden das die Nachkommen von Winteriern von 1927 gewesen sein; im Mai und Juni ist diese Gruppe deutlich zu verfolgen. Im Juli tritt dann eine Komplikation auf, die durchschnittliche Länge wird kleiner da viele Tiere von 32—38 mm hinzu kommen; es müssen das Sommerlarven von 1927 sein. Die graphische Darstellung dieser Mischung ist nicht genau zu analysieren. Es ist aber wahrscheinlich, dass 1928 im September die Winterlarven von 1927 in diesem Gebiet eine Länge

erreicht haben von 50—56 mm, im Oktober von 56—64 mm und die Sommerlarven 1927 eine von  $\pm$  36—40 mm im September und von 38—46 mm im Oktober. Es ist nicht unwahrscheinlich, dass sich unter den grösseren Tieren auch noch ältere befinden; die hohen Frequenzen von 60 mm im Juli und von 64 mm im Oktober weisen daraufhin. Wir können also als wahrscheinlich annehmen, dass das Brackwassergebiet der Zuidersee im Sommer bevölkert wird von Tieren in ihrem 2. Lebensjahr, welche sowohl zu Winter- wie Sommerlarven (namentlich später im Sommer) des vorigen Jahres gehören; erstere erreichen im Oktober, wenn sie sich aus diesem Gebiet zurückziehen, eine Länge von  $\pm$  58 mm, letztere von  $\pm$  42 mm.

Im Wasser mit dem niedrigsten Salzgehalt bestehen die Fänge also hauptsächlich aus Tieren in ihrem 2. Lebensjahr; weiter seewärts mischen sich ältere Tiere dazwischen, deren Zahl in den beiden Versuchsjahren sehr verschieden war, wie aus Abb. 5 ersichtlich ist; 1927 waren die Granat im 3. Lebensjahr in den Fängen reichlich vertreten, namentlich im Herbst, während ihre Zahl 1928 gering war.

Die Granat, welche noch das 4. Lebensjahr erreichen, kommen so wenig vor, dass sie für die Fischerei nur stellenweise einige Bedeutung haben und zwar da, wo namentlich im Winter auf grosser Entfernung von der Küste gefischt wird.

Meine Proben aus allen Gebieten zusammengenommen geben auf 33300 Weibchen 203 Stück (0,6 %) grösser als 80 mm; 22 Stück (0,07 %) grösser als 87 mm und 5 Stück (0,02 %) von 91 mm.

Ueber das Gewicht der Altersgruppen sei hier noch mitgeteilt, dass in der Formel  $G = KL^3$ ,  $K$  ungefähr 0,007 beträgt ( $G$  in gram,  $L$  in cm). Einer vollständigen Uebersicht halber werden in Tabelle 7 Länge und Gewicht der verschiedenen Altersklassen gegeben und dazu die Zahl der Individuen verschiedenen Alters, die in 1 KG gehen. Aus letzterer Zahl ist ersichtlich, wie ausserordentlich schädlich es für den Granatbestand ist, wenn die kleinen Tiere für Geflügelfutter, Granatschrot u.s.w. benutzt werden.

Das Wachstum der Männchen kann nicht so genau für jede Altersgruppe bestimmt werden wie bei den Weibchen. Eine ähnliche graphische Darstellung, wie für die Weibchen angefertigt wurde, besteht für fast jeden Monat aus einer einfachen, eingipfeligen Kurve, deren scharfer Gipfel in jedem Monat zwischen 40 mm und 46 mm liegt.

Nur in einigen Monaten kommen zwei Gipfel vor; ein stark ausgesprochener im Juli 1928 bei 32 mm; eine Länge, welche in Uebereinstimmung mit der von Weibchen von Sommerlarven des vorigen Jahres ist. Weiter findet man einen zweiten Gipfel im März 1927 bei

Tabelle 7.

Länge und Gewicht von Granatweibchen der verschiedenen Altersgruppen,  
Ende Mai

| Alter                       | Länge | Gewicht | Zahl in 1 kg |
|-----------------------------|-------|---------|--------------|
| 11 Monate, Sommerlarven.... | 31 mm | 0,20 gr | 5000         |
| 16 — Winterlarven.....      | 44 —  | 0,57 -  | 1754         |
| 23 — Sommerlarven....       | 55 —  | 1,16 -  | 862          |
| 28 — Winterlarven.....      | 64 —  | 1,90 -  | 526          |
| 35 — Sommerlarven....       | 75 —  | 3,14 -  | 318          |

36 mm, im Mai 1927 und 1928 bei 38 mm bzw. 36 mm, und im September 1927 bei 40 mm. Es ist anzunehmen, dass diese Längen Winterlarven des vorigen Jahres betreffen; sie sind dann etwas kleiner als bei den Weibchen dieser Kategorie gefunden wurde, was jedoch sehr wohl erklärlich ist aus der Tatsache, dass die Grösse der Männchen im Allgemeinen hinter der der Weibchen zurückbleibt. Da diese kleinen Männchen bald nach ihrem Erscheinen in den Fängen der Länge nach nicht mehr von den nächstfolgenden Altersgruppen zu unterscheiden sind, muss die Länge dieser schnell erreicht werden und muss von dann ab das Wachstum nur langsam vor sich gehen. Im 1. Lebensjahr verläuft das Wachstum der Männchen also ungefähr ähnlich dem der Weibchen, nachdem aber eine Länge von ungefähr 40 mm erreicht wird, bleibt das der Männchen stark zurück. Wie der weitere Verlauf ist, geht aus meinen Zahlen nicht hervor und wird durch Messungen auch schwerlich zu ermitteln sein. Die grösste Länge, welche gefunden wurde, war 75 mm (1 auf 22500 Männchen, 0,004 ‰); Männchen grösser als 70 mm sind schon selten (6 auf 22500 Stück, 0,03 ‰); 1,4 ‰ der Männchen sind grösser als 60 mm.

#### Wanderungen und Verbreitung.

Eine der grössten Schwierigkeiten bei der Granatuntersuchung wird wohl gebildet von dem Umstand, dass das Tier so häufige und grosse Wanderungen unternimmt und dass dazu die verschiedenen Jahrgänge und Geschlechter sich verschieden verhalten. Zwar fällt es schon bei oberflächlicher Beobachtung auf, dass die sehr grossen Tiere nur in der Nordsee oder in den seewärts gelegenen Teilen der Flussmündungen in deren unmittelbarer Nähe vorkommen und je weiter man letztere hinaufgeht, um so kleiner wird der Granat, aber viel weiter kommt man ohne statistische Bestimmungen nicht. Es ist aber auch mit deren Hilfe



noch ~~schwer~~, sich ein gutes Bild von den Wanderungsverhältnissen zu machen. Es kommen zwar regelmässige Wanderungen vor — im Winter seewärts und im Frühling flussaufwärts — aber dazu ziehen die Granat oft hin und her, so dass Messungen und sonstige statistische Bestimmungen nur einen äusserst geringen Wert haben, weil kurze Zeit später ganz andere Zahlen gefunden werden können; auch die Durchschnittswerte in den beiden Versuchsjahren können dadurch auch noch in oft sehr weiten Grenzen schwanken. Einige Tatsachen, die ich nach 2 jähriger Beobachtung jedoch als feststehend zu betrachten geneigt bin, werde ich hier erwähnen; an erster Stelle die Verhältnisse bei den Weibchen. Zu diesem Zweck sind die durchschnittlichen Längen von Weibchen ohne Eier (und zum Teil auch von Eiertragenden) in den verschiedenen Zonen und Monaten in Tabelle 8 wiedergegeben. Es zeigt sich daraus, dass die grösste Länge fast immer in der I. Zone gefunden wird und dass sie nach der IV. zu immer kleiner wird.

Tabelle 8.

Durchschnittliche Länge von Granatweibchen ohne Eier [die Zahlen ( ) beziehen sich auf alle Weibchen, die eiertragenden mitgerechnet] in der I.—IV. Zone der Zuidersee (1928) und der Westerschelde (1927 und 1928).

| Monat      | I                        |                      | II                       |                      | III                      |                      | IV                       |                      |
|------------|--------------------------|----------------------|--------------------------|----------------------|--------------------------|----------------------|--------------------------|----------------------|
|            | Wester-<br>schelde<br>mm | Zuider-<br>see<br>mm | Wester-<br>schelde<br>mm | Zuider-<br>see<br>mm | Wester-<br>schelde<br>mm | Zuider-<br>see<br>mm | Wester-<br>schelde<br>mm | Zuider-<br>see<br>mm |
| Januar ..  | .. ..                    | 47 (49)              | ..                       | 47                   | ..                       | ..                   | ..                       | ..                   |
| Februar..  | 48 (49)                  | .. ..                | 46                       | ..                   | ..                       | ..                   | ..                       | ..                   |
| März ....  | 50 (54)                  | 54 (56)              | 46                       | 56                   | ..                       | ..                   | 39                       | ..                   |
| April .... | 56 (59)                  | 56 (58)              | 46                       | 52                   | ..                       | ..                   | 40                       | 44                   |
| Mai .....  | 56 (64)                  | 52 (58)              | 45                       | 53                   | 39                       | ..                   | ..                       | 48                   |
| Juni ..... | 49 (54)                  | 60 (59)              | 47                       | 54                   | 47                       | ..                   | 36                       | 49                   |
| Juli ..... | 52 (61)                  | 47 (50)              | 47                       | 41                   | 57                       | ..                   | ..                       | 45                   |
| August ..  | 56 (50)                  | 54 (55)              | 52                       | 49                   | 59                       | ..                   | 44                       | ..                   |
| September  | 67 (67)                  | 52 (53)              | 56                       | 59                   | 67                       | ..                   | 46                       | 49                   |
| Oktober .  | 63 (63)                  | 59 (59)              | 65                       | 56                   | ..                       | ..                   | ..                       | 56                   |
| November   | 59 (68)                  | 55 (57)              | 54                       | 59                   | ..                       | ..                   | ..                       | ..                   |
| Dezember   | 52 (60)                  | 50 (53)              | 52                       | 52                   | ..                       | ..                   | ..                       | ..                   |

Im Juni und Juli wird die durchschnittliche Länge in der I. und II. Zone kleiner, dies hat wahrscheinlich zweierlei Grund: erstens beginnen dann die Winterlarven und später auch die Sommerlarven des Vorjahres in den Fängen von Bedeutung zu werden und weiter findet, wohl

nach Abschluss der Geschlechtsperiode, eine Wanderung der grösseren Tiere flussaufwärts statt, so dass die Tiere in der II. und III. Zone im August und September fast die gleiche Grösse haben wie in der I. Zone, während sie in dieser im Frühjahr meistens erheblich grösser sind wie in der II. und III. Zone. In der IV. Zone sind die Granat immer viel kleiner als weiter seewärts, auch hier findet man jedoch, dass im Juni (Westerschelde) oder Juli (Zuidersee) die Grösse geringer wird. Wir sehen also, dass im Spätsommer und Herbst die grossen und kleinen Tiere gleichmässig über die I. bis III. Zone verbreitet sind und dass in die IV. Zone nur die kleinen Tiere vordringen. Im Spätherbst und Winter erfolgt eine grosse Wanderung seewärts: die IV. Zone wird ganz verlassen; die grösseren Weibchen — auch wenn sie keine Eier tragen — verlassen die III. und II. Zone und im Winter ziehen sie selbst von den sonstigen Fangplätzen unweit der Küste hinweg und überwintern auf grösserer Tiefe, mehrere Meilen von der Küste<sup>1)</sup>. Die Wanderung in die Tiefe im Winter setzt sich bis zum Februar fort. Ende Januar und Anfang Februar sind fast alle Weibchen über 60 mm Länge und auch die eiertragenden Weibchen aus dem Gebiet verschwunden, zwar sind an den Fangplätzen, wo immer die Proben genommen werden, noch

Tabelle 9.

Granatweibchen prozentisch in 3 Längengruppen geordnet an verschiedenen Stellen von der II. Zone der Zuidersee ab seewärts (Abb. 3, S. 68) und die Veränderung im Laufe des Winters.

| Fangort.....  | Texelstroom      |       |      | Marsdiep         |       |      | Molengat |       |      | Zuiderhaaks<br>(Westgat) |       |      |
|---------------|------------------|-------|------|------------------|-------|------|----------|-------|------|--------------------------|-------|------|
|               | < 51             | 51-60 | > 60 | < 51             | 51-60 | > 60 | < 51     | 51-60 | > 60 | < 51                     | 51-60 | > 60 |
| 1.-15. Dez..  | 6 <sup>2)</sup>  | 16    | 78   | 29 <sup>4)</sup> | 29    | 43   | 40       | 37    | 24   | ..                       | ..    | ..   |
| 15.-31. Dez.. | 41 <sup>2)</sup> | 25    | 34   | 46 <sup>4)</sup> | 23    | 30   | 34       | 35    | 31   | 34                       | 30    | 36   |
| 1.-15. Jan..  | 41 <sup>2)</sup> | 33    | 25   | 51 <sup>4)</sup> | 18    | 32   | 28       | 42    | 30   | 24                       | 37    | 39   |
| 16.-31. Jan.. | 74 <sup>3)</sup> | 21    | 5    | 72 <sup>5)</sup> | 21    | 7    | 83       | 12    | 5    | 51                       | 33    | 16   |

<sup>1)</sup> Man könnte sich denken, dass die Granat nicht wegziehen, sondern sich im Sande vergraben, so dass die Kurre über sie hinstreift. Dies ist aber sehr unwahrscheinlich, denn auch mit einer sehr scharf fischenden Austernkurre (mit feinem Netzbeutel) werden sie nicht gefangen, während die kleineren Tiere damit leicht zu erbeuten sind.

<sup>2)</sup> Auf 10 m Tiefe.

<sup>3)</sup> Auf 20 m Tiefe, auf 10 m war nichts zu fangen.

<sup>4)</sup> Auf 12—16 m Tiefe.

<sup>5)</sup> Auf 19 m Tiefe, auf 12 m war nichts zu fangen.

ziemlich grosse Mengen zu erhalten, aber es sind fast nur sehr kleine Tiere; selbst bei der Boje des Zuiderhaaks, 10 km von der Küste bei einer Tiefe von  $\pm 10$  m sind die grossen und die eiertragenden Weibchen noch selten. Tabelle 9 gibt eine Uebersicht, wie die grossen Weibchen in den Wintermonaten immer mehr aus den üblichen Fanggebieten verschwinden, selbst aus denen, welche wie die bei der Boje Zuiderhaaks, schon 10 km von der Küste liegen. Daraus folgt, dass die grossen Weibchen ihren Winteraufenthaltort noch weiter seewärts suchen. Die kleinen Weibchen kommen im Winter in den tiefen Rinnen des Wattensmeeres nicht nur im Verhältnis zu den grossen in bedeutender Menge vor, sondern auch in absolutem Wert; in den tiefen Rinnen im Texelstroom waren Ende Januar doppelt so viele Granat zu fangen als normal. Offenbar suchen die kleinen Granat zwar auch die tiefsten Stellen auf, aber sie gehen hierzu nicht so weit seewärts, sondern bleiben in der II. Zone. Aus der Tabelle erfolgt weiter, dass die Wanderung der grösseren Weibchen seewärts sich noch bis spät in den Winter fortsetzt; in der 2. Hälfte des Dezember nimmt der Prozentsatz der grossen Weibchen im Texelstroom und Marsdiep stark ab, bleibt dann bis Mitte Januar konstant, um dann noch wieder stark zu sinken; diese letzte Abnahme bleibt aber nicht auf die II. Zone beschränkt, sondern ist auch in der I. Zone (Molengat und Zuiderhaaks) zu konstatieren. Es ist möglich, dass die starke Abnahme in Zusammenhang steht mit der Abkühlung des Wassers während des Frostes im Januar 1928, aber auch in anderen Jahren tritt dieselbe Erscheinung, vielleicht jedoch in geringerem Masse, auf. Der strenge Frost war auch die Ursache, dass im Februar und Anfang März keine Proben zu erhalten waren. In normalen Jahren fängt schon Ende Februar oder Anfang März die Bewegung flussaufwärts an, bei der die kleinen Weibchen vorangehen, so dass im Mai noch fast keine Weibchen grösser als 60 mm in der IV. Zone vorhanden sind. In diesem Monat, und mehr noch im Juni und Juli nimmt die Zahl der grossen Weibchen in der III. Zone stark und in der IV. Zone erheblich zu. Diese Zunahme geht so schnell vor sich, dass sie unmöglich allein durch das Wachstum hervorgerufen sein kann; die belangreichste Ursache muss wohl Zuwanderung sein. Auch findet man dann in der III. Zone Tiere bis zu 80 mm lang; von diesen steht es jedenfalls fest, dass sie hier nicht zu dieser Grösse herangewachsen sind, sondern zugewandert sein müssen. Auch im Abschnitt »Wachstum« ist erwähnt, dass eine Zuwanderung noch spät im Sommer wahrscheinlich ist (S. 78). Was hier von den Weibchen im allgemeinen gesagt ist, ist auch gültig für die Eiertragenden, die nicht weiter als in die III. Zone vordringen; sie sind aber hier durchschnittlich viel weniger zahlreich als in der I.

und II. Zone. Das hängt wohl damit zusammen, dass die Eier in der III. Zone in der Regel nicht reif werden; die Weibchen mit Eiern ziehen sich während deren Reifung in die II. und I. Zone zurück; denn nur in diesen schlüpfen die Eier aus.

Die grösseren (über 40 mm langen) Männchen zeigen in ihrer Wanderung und Verbreitung Uebereinstimmung mit den eiertragenden Weibchen, indem sie auch die Neigung haben in Meeresnähe zu bleiben, wenn auch nicht in so starkem Masse. Zwar findet man sie auch im Brackwasser in der IV. Zone, aber das dauert nur kurze Zeit. Den Winter verbringen sie hauptsächlich in der I. und II. Zone; im Frühling werden sie in der II. und III. Zone zahlreicher, kommen aber in der IV. Zone noch selten vor. Hier findet man sie vom Juli ab (z. B. zahlreich in der Zuidersee, mit einer Länge von 35—47 mm), sie bleiben hier bis im Oktober und haben dann in der Zuidersee eine Länge von 31—53 mm (vgl. auch Tabelle 10). Ein übereinstimmendes Verhalten findet man im Dollart und in der Jade, wie aus den Beobachtungen von EHRENBaum hervorgeht. Hier fangen die Männchen im Juli an zu erscheinen und bleiben da dann bis tief in den Herbst, später als in der IV. Zone der Zuidersee; jedenfalls zum Teil werden diese Gebiete in dieser Hinsicht zu der III. Zone zu rechnen sein; der Dollart gehört hierzu auch darum, weil nach EHRENBaum hier nur Weibchen mit unreifen Eiern vorkommen.

Die Häufigkeit der Männchen in der I. Zone ist in den 3 von mir untersuchten Bezirken sehr verschieden, weitaus am häufigsten sind sie in der Nähe der Ausmündungen der Zuidersee. Die Ursache davon ist wohl, dass ungeheure Mengen Weibchen und nur verhältnismässig wenig Männchen in den südlichen, brackischen (spez. Gew. 1.005—1.010) Teil der Zuidersee ziehen. In Tabelle 10 sind die Zahlen für die Zuidersee und zum Vergleich für die Westerschelde gegeben.

Aus der Tabelle geht weiter hervor, dass die Männchen im Winter, bis im März in der I. Zone zahlreicher sind als in der II. Zone, und vom April ab bis ungefähr November gewöhnlich umgekehrt; Anfang Frühling findet also eine Wanderung von der I. in die II. Zone statt, an welcher die Männchen noch mehr beteiligt sind als die Weibchen.

Die Differenzierung der Geschlechter und Altersstufen findet man am deutlichsten im Zuiderseegebiet, weil die verschiedenen Zonen hier weit auseinander liegen. Was oben mitgeteilt wurde, bezieht sich nur auf die grösseren Tiere, die sehr kleinen (bis 40 mm Länge) kommen in geringerer Menge auch zwischen den grösseren in der I. und III. Zone, viel weniger in der IV. Zone vor. Man findet sie im Frühsommer jedoch

Tabelle 10.

Relative Häufigkeit von Granatmännchen über 40 mm lang in der Mündung der Zuidersee und der Westerschelde in Prozentsätzen berechnet auf die Gesamtzahl von Männchen über 40 mm und Weibchen über 50 mm lang.

| Monat          | Prozentsätze von Männchen in der |          |                  |                             |          |                  |
|----------------|----------------------------------|----------|------------------|-----------------------------|----------|------------------|
|                | Zuidersee <sup>1)</sup>          |          |                  | Westerschelde <sup>1)</sup> |          |                  |
|                | I. Zone                          | II. Zone | IV. Zone         | I. Zone                     | II. Zone | IV. Zone         |
| Januar.....    | 51                               | 47       | ..               | ..                          | ..       | ..               |
| Februar.....   | ..                               | ..       | ..               | 45                          | 7        | ..               |
| März.....      | 47                               | 29       | ..               | 31                          | 15       | 0                |
| April.....     | 50                               | 72       | 0                | 29                          | 38       | 0                |
| Mai.....       | 19                               | 52       | 0                | 23                          | 31       | 0                |
| Juni.....      | 14                               | 20       | 0                | 27                          | 31       | 0                |
| Juli.....      | 66                               | 56       | 49               | 24                          | 34       | ..               |
| August.....    | 78                               | 60       | ..               | 39                          | 34       | 43 <sup>2)</sup> |
| September..... | 68                               | 79       | 27               | 29                          | 32       | 61               |
| Oktober.....   | 53                               | 58       | 13 <sup>3)</sup> | 25                          | 12       | ..               |
| November.....  | 73                               | 70       | .. <sup>4)</sup> | 48                          | 29       | .. <sup>4)</sup> |
| Dezember.....  | 56                               | 63       | .. <sup>4)</sup> | 53                          | 29       | .. <sup>4)</sup> |

in ausserordentlich grosser Menge (namentlich auch Männchen) in der II. Zone (innerhalb der Watteninseln). Wenn sie heranwachsen, gehen sie im Laufe des Sommers allmählich in die III. und IV. Zone über, so dass hier im Spätsommer oder früh im Herbst die grössten Fänge gemacht werden. In der Westerschelde dagegen kommen die kleinsten Tiere in der II.—IV. Zone ziemlich gleichmässig verteilt vor, nur sind sie in der IV. Zone etwas häufiger.

Es wird nicht überflüssig sein, die verwickelten Wanderungsverhältnisse hier in übersichtlicher Form noch einmal zusammenzufassen.

Dezember—Februar, in der I. Zone viele grosse Weibchen; Ende Januar weit von der Küste, Weibchen mit reifen Eiern und grosse Männchen nur hier; in den tiefen Rinnen der II. Zone hauptsächlich kleine Tiere (Männchen und Weibchen); die III. und IV. Zone grösstenteils verlassen.

<sup>1)</sup> Zuidersee 1928, Westerschelde 1927 und 1928.

<sup>2)</sup> 8. August 1927 16 ‰, 27. August 1928 70 ‰.

<sup>3)</sup> Im salzarmersten Teil durchschnittlich 6 ‰, im salzreichsten 20 ‰.

<sup>4)</sup> Männchen und Weibchen ziehen sich aus dieser Zone zurück.

März—April, eine allgemeine Wanderung flussaufwärts; in der II. Zone wieder viele grosse Weibchen und Männchen, die III. und später auch die IV. Zone wird wieder — aber nur von kleineren Tieren — bevölkert.

Mai—Juli, Weibchen mit reifen Eiern auch zahlreich in der II. Zone, die III. Zone wird auch von grösseren Tieren reichlich bevölkert, die IV. Zone nur noch von kleineren Weibchen; Männchen beginnen erst am Ende dieser Periode zahlreicher in der IV. Zone aufzutreten; die durchschnittliche Länge der Granat in allen Fängen ist verhältnissmässig klein, weil darin viele kleine Tiere des Vorjahres vorkommen.

August—Oktober, die Fortpflanzungsperiode ist vorbei; die grossen Tiere sind ziemlich gleichmässig auf die I.—III. Zone verteilt; Männchen in der IV. Zone zahlreich, wandern aber am Ende der Periode wieder ab; die durchschnittliche Länge ist gross.

Ende Oktober und November bilden die Uebergangszeit zur Fortpflanzungsperiode und zur Rückwanderung seewärts.

### Nahrung.

Regelmässig wurde auch der Mageninhalt untersucht; die Ergebnisse waren wesentlich dieselben wie EHRENBAUM in seiner Arbeit angibt. Ich werde mich also auf eine kurze Notiz beschränken.

Auch in den holländischen Gewässern bilden Würmer und von diesen namentlich *Nereis*-Arten, z.B. *N. succinea* und *diversicolor*, die belangreichste Nahrungsquelle des Granat. An der Nordseeküste kommen noch einige andere Arten und Gattungen hinzu, die aber an den oft spärlichen Resten nicht immer einwandfrei zu bestimmen waren.

Auf die Würmer folgen in Häufigkeit die Kruster, und von diesen ist weitaus an der ersten Stelle *Corophium* zu nennen; viel weniger häufig ist *Gammarus*, während *Neomysis* und *Praunus* nur in vereinzelt Proben anzutreffen waren. Selten wurden junge Fische oder Fischlarven gefunden, vereinzelt auch Weichtiere wie *Hydrobia* und *Mya arenaria* (z.B. eine unverletzte Schale von 1,4 mm Länge).

Oft ist der Magen auch mit Detritus und Schlick gefüllt, dies ist namentlich im Frühling der Fall; es ist aber oft nicht leicht zu bestimmen, ob der Schlick von Würmern herkommt oder direkt von dem Granat gefressen war.

In verschiedenen Proben ist es mir aufgefallen, dass die grösseren Granat meist Würmer (*Nereis*) gefressen hatten, während die Magen der kleineren mit *Corophium* gefüllt waren. Ueber das ganze Jahr gerechnet wurden in 38 % der Fälle nur Würmer gefunden, in 31 % nur

Kruster, in 9% Würmer und Kruster und in 22% Detritus. Diese Prozentsätze sind in den verschiedenen Bezirken: Zuidersee, Haringvliet und Westerschelde ungefähr gleich. Nach der Zeit gibt es aber ziemlich grosse Unterschiede in der Zusammensetzung des Mageninhaltes. Detritus und Schlick kommt fast ausschliesslich im Winter und Frühling vor. Im Frühling und im Frühsommer werden verhältnismässig vielleicht etwas mehr Würmer gefunden als im Spätsommer und Herbst, aber in dieser Hinsicht kommen sehr grosse Schwankungen vor.

Ohne Zweifel ist das Vorhandensein von grossen Mengen Nahrung an bestimmten Stellen oft die Ursache von den unregelmässigen, kleineren Wanderungen des Granat. Ich halte es aber für wahrscheinlich, dass der Trieb für die grossen Saisonwanderungen vielmehr der Temperaturwechsel ist, weil es sich zeigt, dass sie immer von niedrigeren zu höheren Temperaturen erfolgen. Diese grossen und kleinen Wanderungen ergänzen einander zum Erreichen eines maximalen Wachstums, wozu reiche Nahrung und hohe Temperatur beide in gleichem Masse notwendig sind.

---
